# Supplementary material for: Ultrahigh reversible lithium storage of hierarchical porous Co–Mo oxides via graphene encapsulation and hydrothermal S-doping
Source: Royal Society of Chemistry journal article supplement (doi:10.1039/d1ta10531k), 2022-01-01
Supplement: d1ta10531k1.pdf [file d1ta10531k1.pdf]

## Supporting Information

### **Ultrahigh Reversible Lithium Storage of Hierarchical Porous Co-Mo Oxides via Graphene Encapsulation and Hydrothermal S-Doping**

Jiatao Chen<sup>a,b</sup>, Kongjun Zhu<sup>a,\*</sup>, Penghua Liang<sup>a,b</sup>, Meng Wu<sup>a,b</sup>, Yu Rao<sup>a,b</sup>, Hongjuan Zheng<sup>a</sup>,  
Jinsong Liu<sup>b</sup>, Kang Yan<sup>a</sup> and Jing Wang<sup>a</sup>

<sup>a</sup> State Key Laboratory of Mechanics and Control of Mechanical Structures, College of Aerospace  
Engineering, Nanjing University of Aeronautics and Astronautics, Nanjing, 210016, China.

<sup>b</sup> College of Materials Science and Technology, Nanjing University of Aeronautics and  
Astronautics, Nanjing, 210016, China.

\*Corresponding author: [kjzhu@nuaa.edu.cn](mailto:kjzhu@nuaa.edu.cn) (Kongjun Zhu).

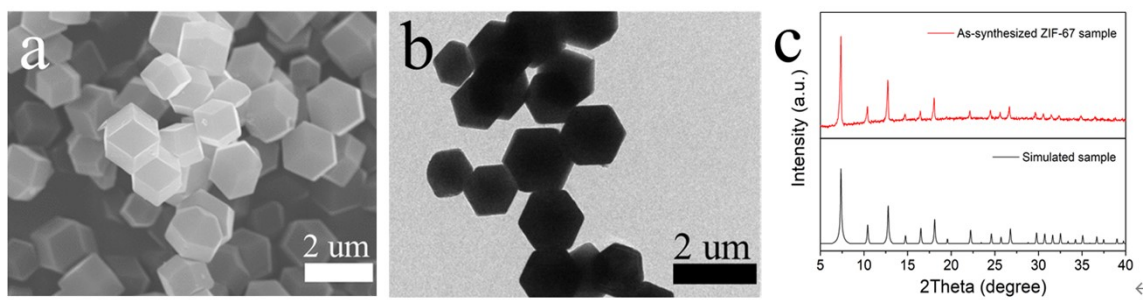

Figure S1. a) SEM image, b) TEM image and c) XRD patterns of ZIF-67 crystals

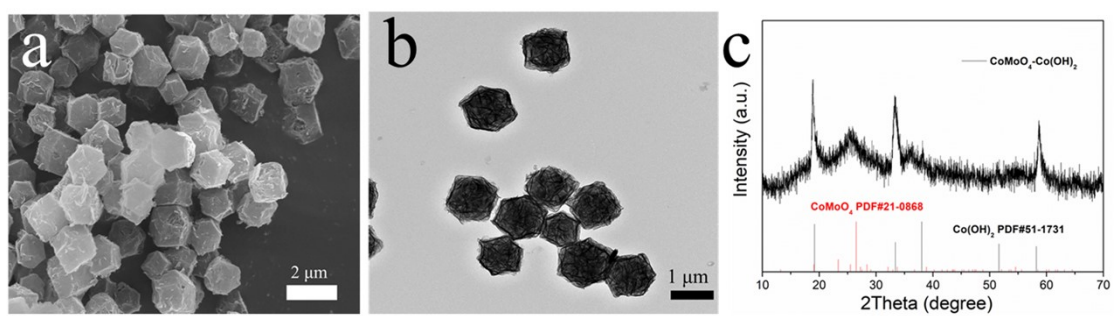

Figure S2. a) SEM image, b) TEM image and c) XRD pattern of  $\text{CoMoO}_4\text{-Co(OH)}_2$  NPs

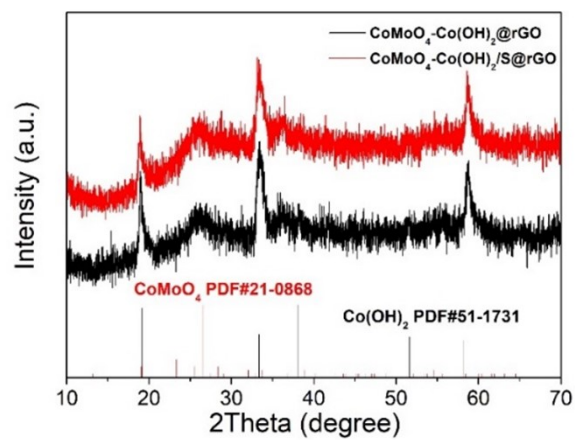

Figure S3. XRD patterns of  $\text{CoMoO}_4\text{-Co(OH)}_2@r\text{GO}$  and  $\text{CoMoO}_4\text{-Co(OH)}_2/\text{S}@r\text{GO}$  NPs

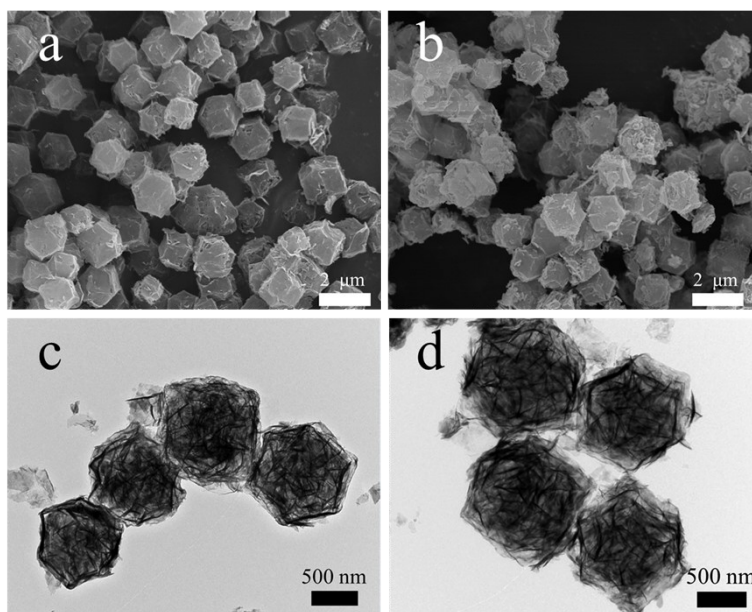

Figure S4. a) SEM image of  $\text{CoMoO}_4\text{-CoO}/\text{S}@r\text{GO}$ . b) SEM image of  $\text{CoMoO}_4\text{-CoO}@r\text{GO}$ . c) TEM image of  $\text{CoMoO}_4\text{-CoO}/\text{S}@r\text{GO}$ . d) TEM image of  $\text{CoMoO}_4\text{-CoO}@r\text{GO}$ .

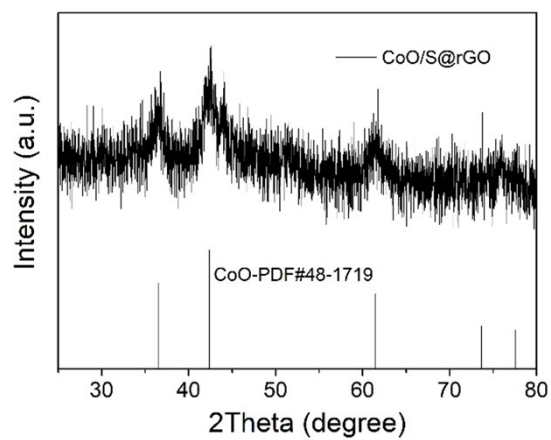

Figure S5. XRD pattern of CoO/S@rGO.

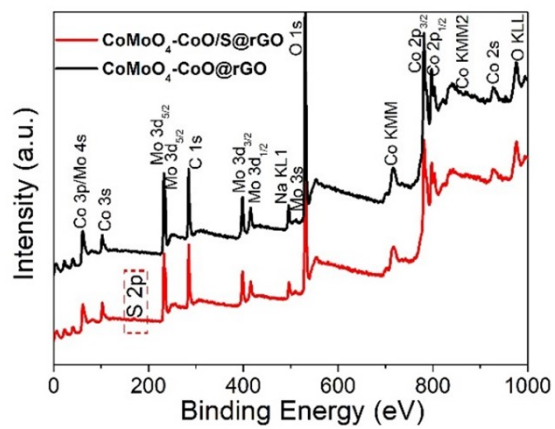

Figure S6. XPS survey spectra of CoMoO<sub>4</sub>-CoO/S@rGO and CoMoO<sub>4</sub>-CoO@rGO NPs.

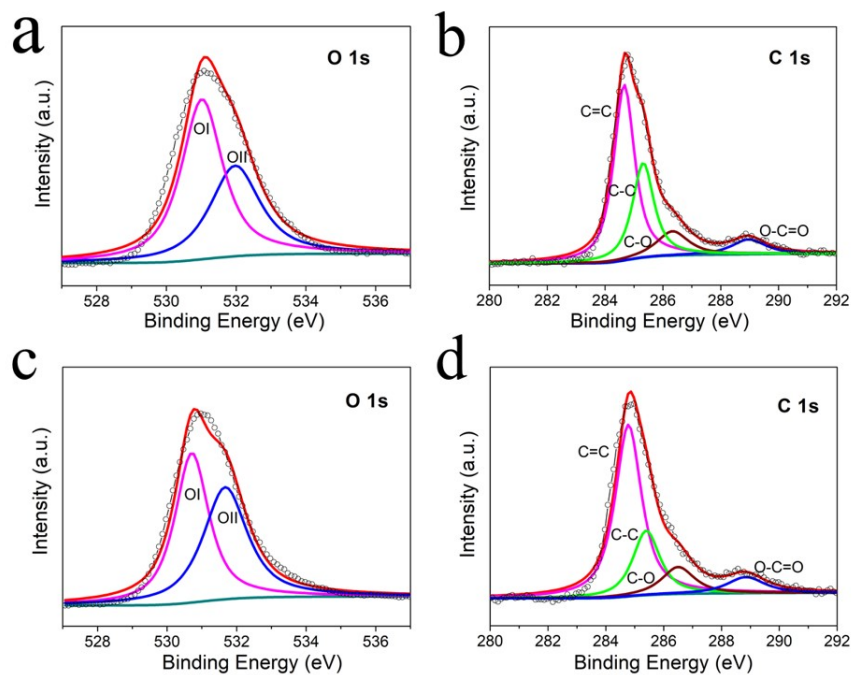

Figure S7. High-resolution a) O 1s, b) C 1s XPS spectra of CoMoO<sub>4</sub>-CoO/S@rGO. High-resolution c) O 1s, b) C 1s XPS spectra of CoMoO<sub>4</sub>-CoO@rGO.

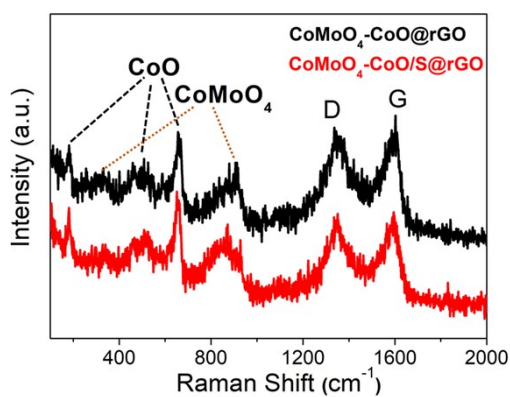

Figure S8. Raman spectra of CoMoO<sub>4</sub>-CoO/S@rGO and CoMoO<sub>4</sub>-CoO@rGO NPs.

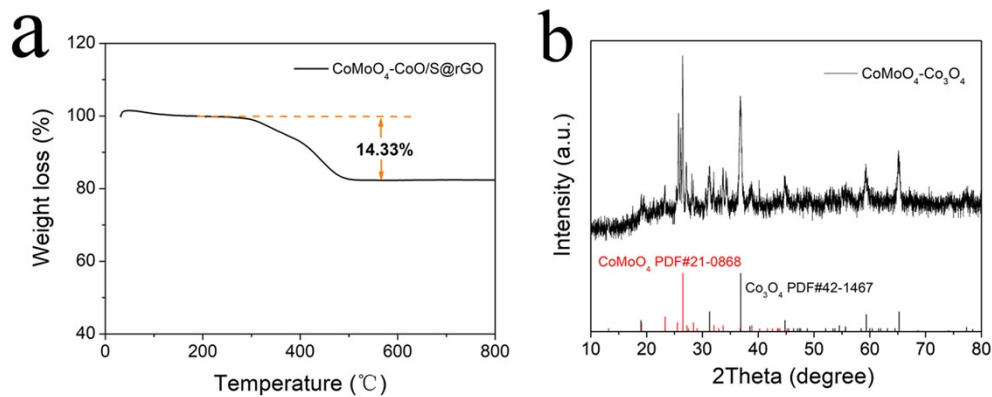

Figure S9. a) TGA curve of  $\text{CoMoO}_4\text{-CoO/S@rGO}$  NPs under air atmosphere. b) XRD pattern of powders obtained after TG test.

From room temperature to 200 °C, the weight loss could be due to the release of  $\text{H}_2\text{O}$  and the little weight increase at the beginning could be attributed to dry powders absorbing moisture from the air. The main weight variation ( $\sim 14.33$  wt%) from 200 °C to 600 °C originates from the combustion of the rGO and the oxidation of CoO to  $\text{Co}_3\text{O}_4$ , which can be seen from the XRD pattern of powders obtained after TG test (Figure S10b). From Table S1, we can roughly estimate the proportion of CoO in  $\text{CoMoO}_4\text{-CoO/S}$  is  $\sim 65\%$  according to the Mo and Co atomic content. Thus, the weight

increase from CoO to  $\text{Co}_3\text{O}_4$  is  $\sim 2.76$  wt%  $\left( \frac{65\% \times 74.9}{65\% \times 74.9 + 35\% \times 218.9} \times 7.1\% \right)$ . Therefore, the rGO content in the  $\text{CoMoO}_4\text{-CoO/S@rGO}$  NPs is around 17.09 %.

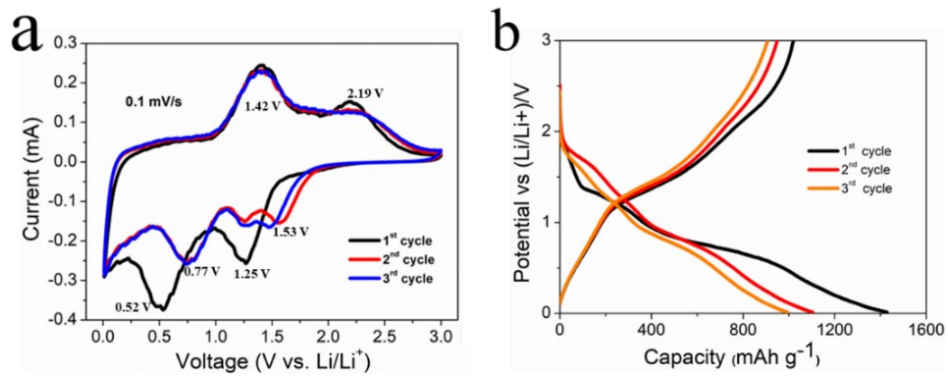

Figure S10. a) The first three cycles of CV curves at  $0.1 \text{ mV s}^{-1}$  of  $\text{CoMoO}_4\text{-CoO@rGO}$  electrode.  
 b) The first three charge/discharge curves of  $\text{CoMoO}_4\text{-CoO@rGO}$  electrode at  $0.5 \text{ A g}^{-1}$ .

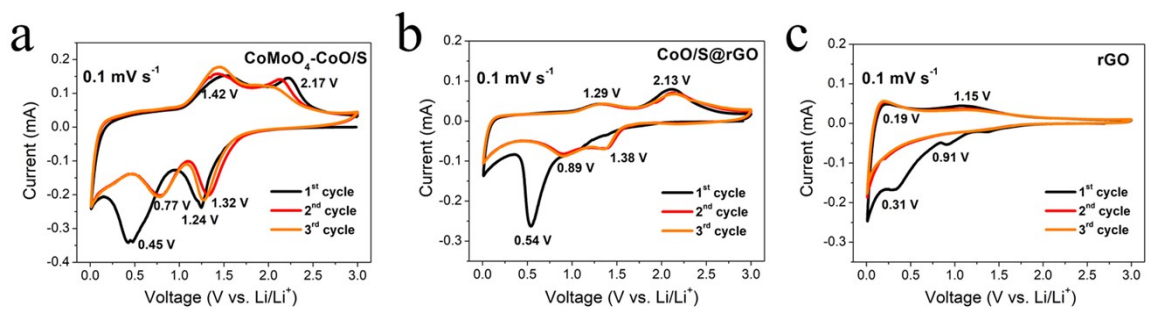

Figure S11. The first three cycles of CV curves at  $0.1 \text{ mV s}^{-1}$  of a) the  $\text{CoMoO}_4\text{-CoO/S}$  electrode,  
 b)  $\text{CoO/S@rGO}$  electrode, and c)  $\text{rGO}$  electrode.

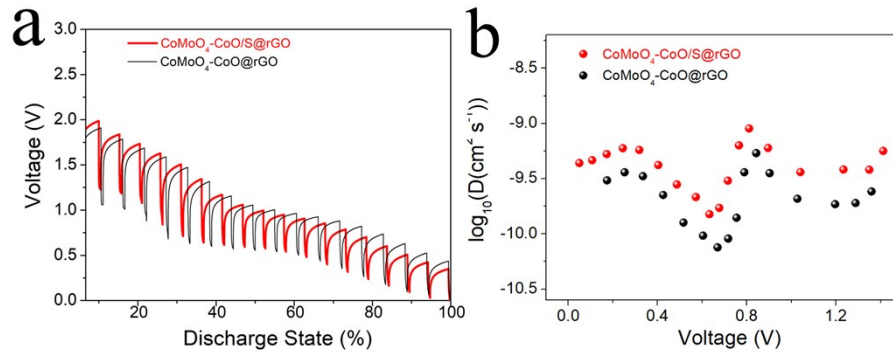

Figure S12. a) Discharge state curves of GITT measurement for CoMoO<sub>4</sub>-CoO/S@rGO and CoMoO<sub>4</sub>-CoO@rGO electrodes at 0.5 A g<sup>-1</sup>. b) The D<sub>Li<sup>+</sup></sub> of CoMoO<sub>4</sub>-CoO/S@rGO and CoMoO<sub>4</sub>-CoO@rGO electrodes during the discharge process at 0.5 A g<sup>-1</sup>.

The Li-ion diffusion coefficients of CoMoO<sub>4</sub>-CoO/S@rGO and CoMoO<sub>4</sub>-CoO@rGO electrodes can be measured according to the following Equation (1)

$$D_{\text{Li}^+} = \frac{4L^2}{\pi\tau} \left( \frac{\Delta E_s}{\Delta E_\tau} \right)^2 \quad (1)$$

where L and τ are the thickness of the electrodes (cm) and the duration of the current pulse (s), respectively. ΔE<sub>s</sub> is the change in steady-state voltage (V) for a single-step GITT measurement, and ΔE<sub>τ</sub> is the voltage change (V) during one discharge pulse regardless of IR drop.

Table S1. Elemental quantification of CoMoO<sub>4</sub>-CoO/S@rGO

|                               | Co (wt. %) | Mo (wt. %) | S (wt. %) |
|-------------------------------|------------|------------|-----------|
| CoMoO <sub>4</sub> -CoO/S@rGO | 21.43      | 7.4        | 0.35      |



Table S2. Comparison of specific capacity of CoMoO<sub>4</sub>-CoO/S@rGO electrode with some CoO-based materials

| Materials                                                 | Current density<br>(A g <sup>-1</sup> ) | Cycle<br>number | Specific capacity<br>(mAh g <sup>-1</sup> ) | Ref.      |
|-----------------------------------------------------------|-----------------------------------------|-----------------|---------------------------------------------|-----------|
| CoMoO <sub>4</sub> -CoO/S@rGO                             | 0.5                                     | 150             | 1103                                        | This work |
|                                                           | 2.0                                     | 300             | 700                                         |           |
| CoO-NCNTs                                                 | 0.5                                     | 2000            | 583                                         | 1         |
| CoO@C                                                     | 0.5                                     | 300             | 890                                         | 2         |
| CoO/N, S-C                                                | 1.0                                     | 500             | 805                                         | 3         |
| CoO/C YSNSs                                               | 1.0                                     | 1000            | 672                                         | 4         |
| CoO-graphene hydrogel                                     | 0.1                                     | 100             | 1010                                        | 5         |
| CoO/Co <sub>2</sub> Mo <sub>3</sub> O <sub>8</sub> @MXene | 2.0                                     | 1200            | 545                                         | 6         |
| CoC <sub>2</sub> O <sub>4</sub> @CoO/Co                   | 0.2                                     | 200             | 837                                         | 7         |
| Co <sub>3</sub> O <sub>4</sub> /CoO/Co foam               | 0.1                                     | 50              | 989                                         | 8         |
| CoO/MnCo <sub>2</sub> O <sub>4.5</sub>                    | 1.0                                     | 120             | 657                                         | 9         |
| CoO/CoFe <sub>2</sub> O <sub>4</sub> /EG                  | 1.0                                     | 700             | 890                                         | 10        |

- 1 Y. Pang, S. Chen, C. Xiao, S. Ma and S. Ding, *J. Mater. Chem. A*, 2019, **7**, 4126-4133.
- 2 F. Wu, S. Zhang, B. Xi, Z. Feng, D. Sun, X. Ma, J. Zhang, J. Feng and S. Xiong, *Adv. Energy Mater.*, 2018, **8**.
- 3 F. Wang, H.-Y. Zhuo, X. Han, W.-M. Chen and D. Sun, *J. Mater. Chem. A*, 2017, **5**, 22964-22969.
- 4 S. Wang, J. Teng, Y. Xie, Z.-W. Wei, Y. Fan, J.-J. Jiang, H.-P. Wang, H. Liu, D. Wang and C.-Y. Su, *J. Mater. Chem. A*, 2019, **7**, 4036-4046.
- 5 G. Binitha, A. G. Ashish, D. Ramasubramonian, P. Manikandan and M. M. Shaijumon, *Adv. Mater. Interfaces*, 2016, **3**.
- 6 X. Zhao, H. Xu, Z. Hui, Y. Sun, C. Yu, J. Xue, R. Zhou, L. Wang, H. Dai, Y. Zhao, J. Yang, J. Zhou, Q. Chen, G. Sun and W. Huang, *Small*, 2019, **15**, e1904255.
- 7 Z. He, L.-a. Huang, J. Guo, S.-e. Pei, H. Shao and J. Wang, *Energy Storage Mater.*, 2020, **24**, 362-372.
- 8 H. Park, K. Kim, K. Jeong, J. S. Kang, H.-H. Cho, B. Thirumalraj, Y.-E. Sung, H. N. Han, J.-H. Kim, D. C. Dunand and H. Choe, *Appl. Surf. Sci.*, 2020, **525**.
- 9 L. Ni, W. Tang, X. Liu, N. Zhang, J. Wang, S. Liang, R. Ma and G. Qiu, *Dalton Trans.*, 2018, **47**, 3775-3784.
- 10 L. Ye, C. Wang, L. Cao, H. Xiao, J. Zhang, B. Zhang and X. Ou, *Green Energy Environ.*, 2021, **6**, 725-733.
